# Supplementary material
Source: PubMed Central journal article supplement (PMC5361889)
Supplement: NIHMS850670-supplement-Supplemental_Information.pdf [file NIHMS850670-supplement-Supplemental_Information.pdf]

*Supporting Information for Publication:*

**Developing a Multiplexed Quantitative Cross-linking Mass Spectrometry Platform for  
Comparative Structural Analysis of Protein Complexes**

Clinton Yu<sup>1</sup>, Alexander Huszagh<sup>1</sup>, Rosa Viner<sup>2</sup>, Eric J. Novitsky<sup>3</sup>, Scott D. Rychnovsky<sup>3</sup>, Lan  
Huang<sup>1</sup>

<sup>1</sup>Department of Physiology & Biophysics, University of California, Irvine, Irvine, CA 92697

<sup>2</sup>Thermo Fisher, 355 River Oaks Parkway, San Jose, CA 95134

<sup>3</sup>Department of Chemistry, University of California, Irvine, Irvine, CA 92697

\*Correspondence should be addressed to: Dr. Lan Huang (lanhuang@uci.edu)  
Medical Science I, D233  
University of California, Irvine  
Irvine, CA 92697-4560  
Phone: (949) 824-8548  
Fax: (949) 824-8540

## **TABLE OF CONTENTS**

**1. Supplemental Figure 1**

**2. Supplemental Table 1**

## SUPPLEMENTAL FIGURES

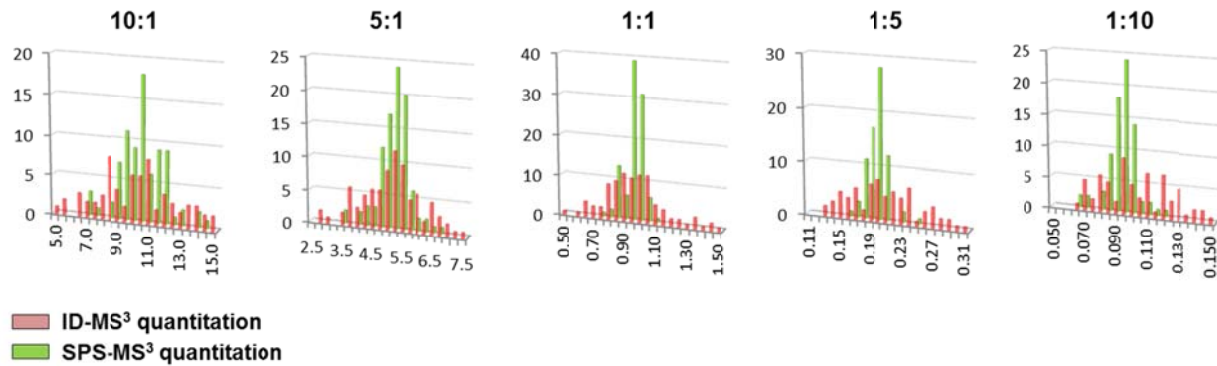

**Figure S-1. Distribution of raw cross-link quantitative ratios across five input mixings using ID-SPS-MS3.** Reporter ion ratios for TMT2-126:TMT2-127 as determined by ID-MS<sup>3</sup> (red) and SPS-MS<sup>3</sup> (green). For each mixing, quantitative ratios derived from SPS-MS<sup>3</sup> acquisitions clustered more tightly around average values than those derived from ID-MS<sup>3</sup> acquisitions. As a result, there was a corresponding decrease in standard deviation observed from MultiNotch acquisitions.

**Table S-1. List of the Unique Cytochrome c K-K linkages Identified Using Different Acquisition Methods.**

| XL Residue 1 | XL Residue 2 | ID-MS <sup>3</sup> | ID-MS <sup>3</sup> + SPS-MS <sup>3</sup> |
|--------------|--------------|--------------------|------------------------------------------|
| K6           | K28          | X                  | X                                        |
| K6           | K40          | X                  | X                                        |
| K6           | K54          | X                  |                                          |
| K6           | K87          | X                  | X                                        |
| K6           | K88          | X                  | X                                        |
| K6           | K89          | X                  | X                                        |
| K6           | K100         | X                  | X                                        |
| K6           | K101         | X                  | X                                        |
| K8           | K14          | X                  |                                          |
| K8           | K26          | X                  | X                                        |
| K8           | K28          | X                  | X                                        |
| K8           | K40          | X                  | X                                        |
| K8           | K54          | X                  |                                          |
| K8           | K73          | X                  |                                          |
| K8           | K88          | X                  |                                          |
| K8           | K89          | X                  |                                          |
| K8           | K100         | X                  | X                                        |
| K8           | K101         | X                  | X                                        |
| K9           | K26          |                    | X                                        |
| K9           | K28          | X                  | X                                        |
| K9           | K40          | X                  | X                                        |
| K9           | K54          | X                  |                                          |
| K9           | K73          | X                  |                                          |
| K9           | K87          | X                  | X                                        |
| K9           | K88          | X                  | X                                        |
| K9           | K89          | X                  | X                                        |
| K9           | K100         | X                  | X                                        |
| K9           | K101         |                    | X                                        |
| K14          | K40          | X                  |                                          |
| K26          | K26          | X                  | X                                        |
| K26          | K28          | X                  | X                                        |
| K26          | K40          | X                  | X                                        |
| K26          | K54          | X                  | X                                        |
| K26          | K73          | X                  | X                                        |
| K26          | K80          | X                  |                                          |
| K26          | K88          | X                  | X                                        |
| K26          | K89          | X                  | X                                        |

|     |      |   |   |
|-----|------|---|---|
| K26 | K100 | X | X |
| K28 | K26  | X | X |
| K28 | K40  | X | X |
| K28 | K54  | X | X |
| K28 | K88  |   | X |
| K28 | K89  | X | X |
| K28 | K100 | X | X |
| K40 | K40  | X | X |
| K40 | K54  | X | X |
| K40 | K56  | X | X |
| K40 | K73  | X | X |
| K40 | K74  | X | X |
| K40 | K80  | X | X |
| K40 | K87  | X | X |
| K40 | K88  | X | X |
| K40 | K89  | X | X |
| K40 | K100 | X | X |
| K40 | K101 | X | X |
| K54 | K54  | X | X |
| K54 | K73  | X | X |
| K54 | K74  | X | X |
| K54 | K80  | X | X |
| K54 | K87  | X | X |
| K54 | K88  | X | X |
| K54 | K89  | X | X |
| K54 | K100 | X | X |
| K56 | K74  | X | X |
| K56 | K88  | X |   |
| K73 | K74  | X | X |
| K73 | K80  | X | X |
| K73 | K87  | X | X |
| K73 | K88  | X | X |
| K73 | K89  | X | X |
| K73 | K100 | X |   |
| K74 | K80  |   | X |
| K74 | K87  | X | X |
| K74 | K88  | X | X |
| K74 | K89  | X | X |
| K74 | K100 | X | X |
| K80 | K89  | X | X |
| K80 | K100 | X |   |
| K87 | K89  | X | X |
| K87 | K100 | X | X |

|      |      |   |   |
|------|------|---|---|
| K88  | K100 | X | X |
| K89  | K100 | X | X |
| K100 | K100 | X | X |
